# Supplementary material for: An evolutionary functional genomics approach identifies novel candidate regions involved in isoniazid resistance in Mycobacterium tuberculosis
Source: PubMed Central journal article supplement (PMC8613195; doi:10.1038/s42003-021-02846-z), 2021-11-24
Supplement: 42003_2021_2846_MOESM2_ESM.pdf [file 42003_2021_2846_MOESM2_ESM.pdf]

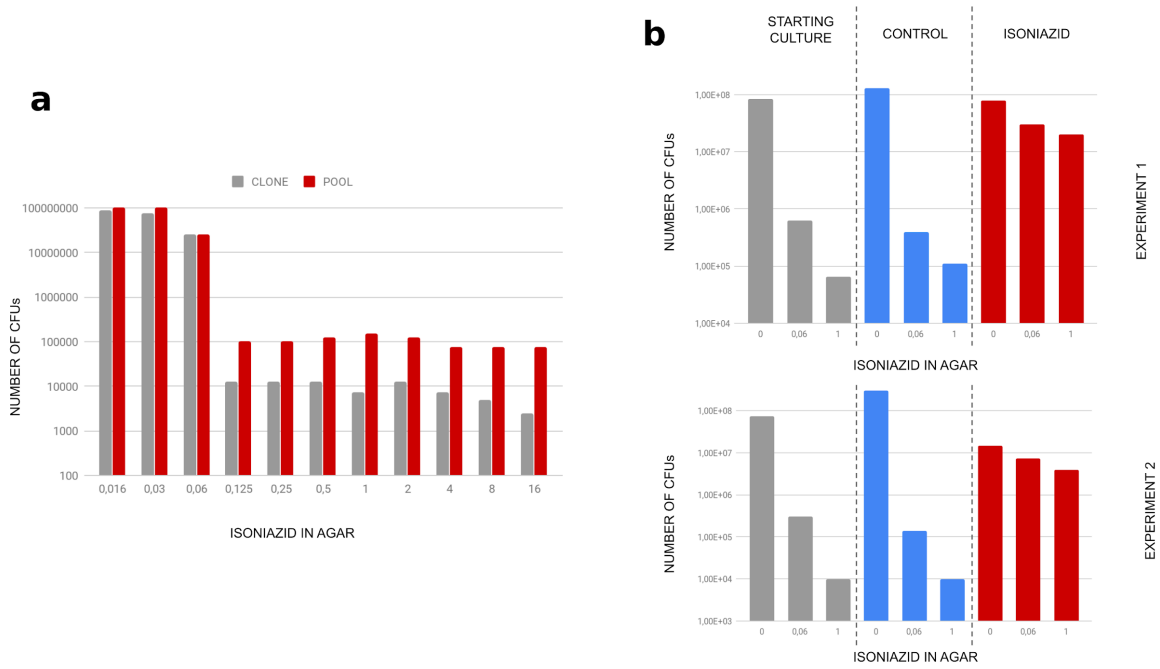

**Supplementary Figure 1:** a) The pool contains 10 times more isoniazid resistant mutants than its parental clone. b) Throughout the experiment, the frequency of isoniazid resistant mutants increased specifically in populations treated with the antibiotic.

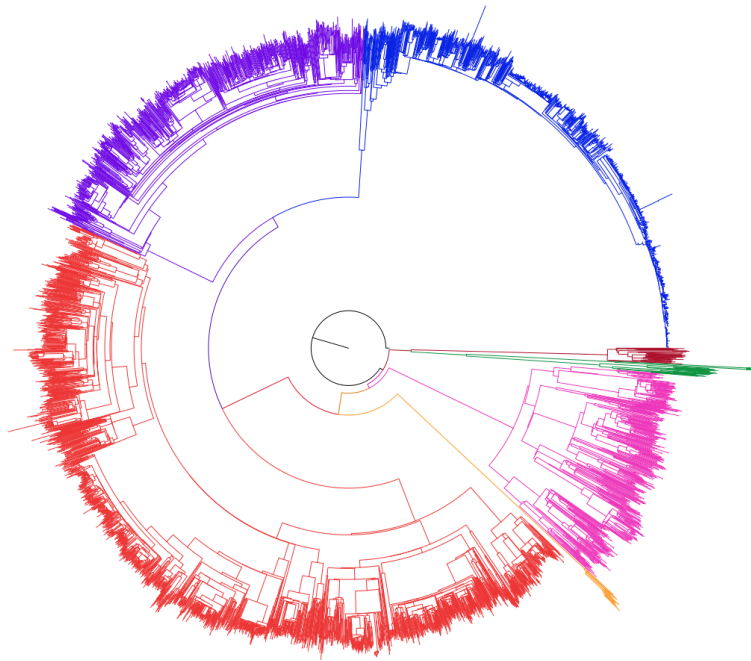

**Supplementary Figure 2:** Global phylogeny generated with a collated dataset from various sources. Interactive phylogeny can be found at <https://itol.embl.de/tree/161111218247308411581608730>

**a**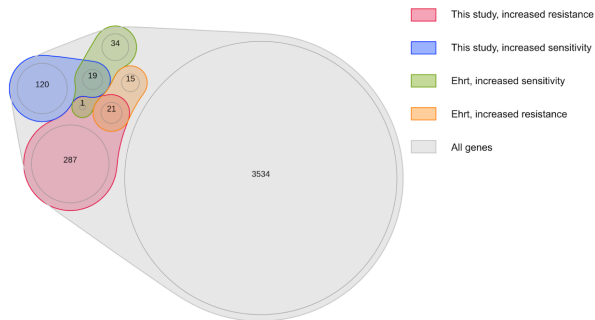**b**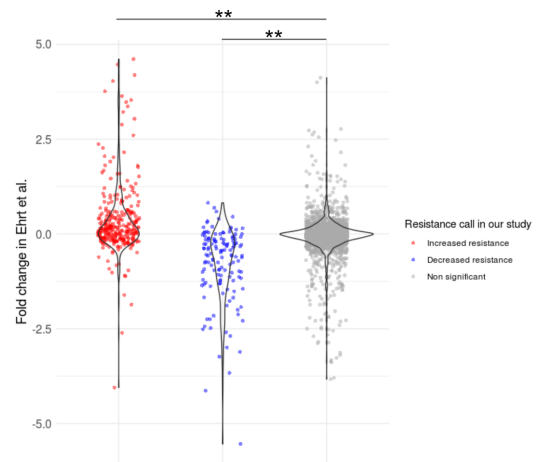

**Supplementary Figure 3:** **a)** Coincidence in resistance-altering features detected by functional genomics between our study and that of Ehrt *et al.* **b)** Our resistance-altering features showed similar phenotypes in Xu, W. *et al.* Chemical Genetic Interaction Profiling Reveals Determinants of Intrinsic Antibiotic Resistance in *Mycobacterium tuberculosis*. *Antimicrob. Agents Chemother.* **61**, (2017).

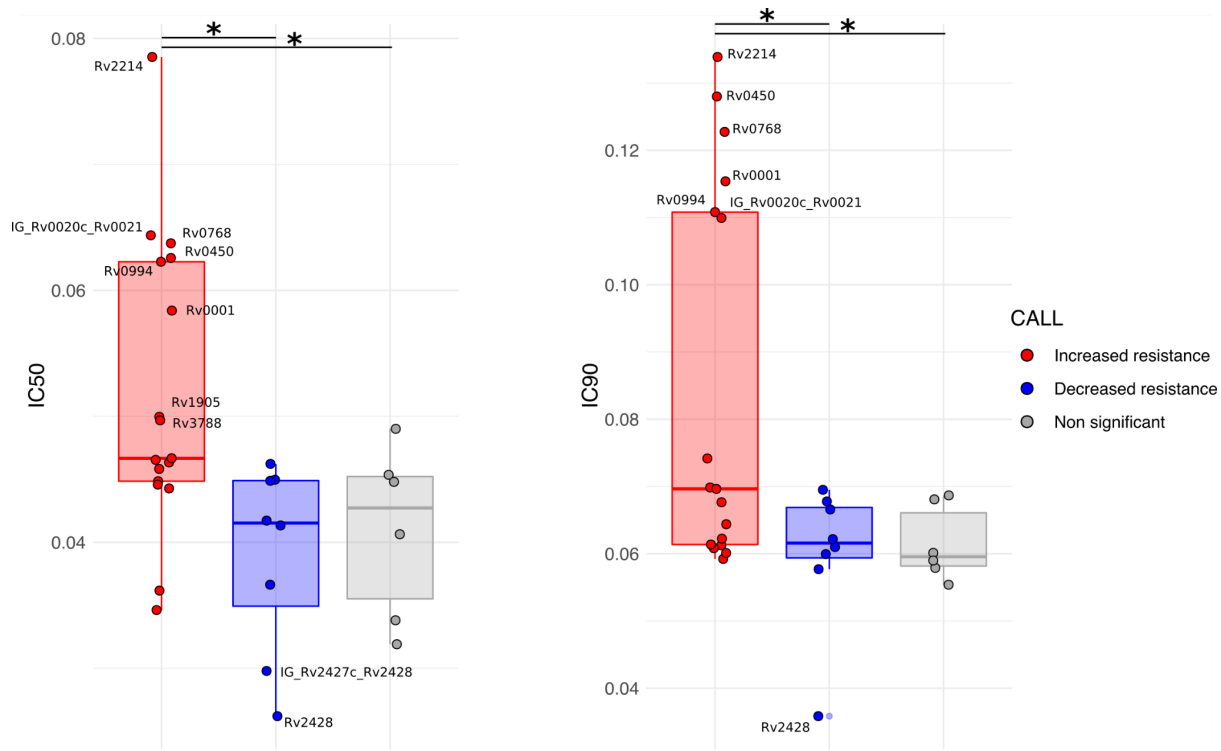

**Supplementary Figure 4:** Boxplots of IC50 (left) and IC90 (right) values for a collection of candidate gene insertion mutants on a BCG background.

| Oligo ID     | Sequence                                                  | Modification | Purification | Comment                                              |
|--------------|-----------------------------------------------------------|--------------|--------------|------------------------------------------------------|
| Adap1_Lig    | TACCACGACCA                                               | 3'AmC7       | HPLC         | Ligation to gDNA fragments                           |
| Adap2_NX_Lig | AGATGTGTATAAGAGACAGTGNNANNANNNTGGT<br>CGTGGTAT            | -            | HPLC         | Ligation to gDNA fragments                           |
| Adap2_NX_PCR | GTCTCGTGGGCTCGGAGATGTGTATAAGAGACAG                        | -            | HPLC         | Tn-Junction pcr, complementary to Adap2              |
| T7_NX_PCR    | TCGTCCGCAGCGTCAGATGTGTATAAGAGACAGC<br>GGGGACTTATCAGCCAACC | -            | HPLC         | Tn-Junction pcr, complementary to T7 ending sequence |

**Supplementary Table 1. Oligos used during the experiment for library preparation.**

```
begin assumptions;
options deftype=unord;
usertype myCosts (stepmatrix) = 5
0 A T C G
0 0.1 0.1 0.1 0.1
1 0 0.1 0.1 0.1
1 0.1 0 0.1 0.1
1 0.1 0.1 0 0.1
1 0.1 0.1 0.1 0;
typeset * a = myCosts: all;
end;

outgroup MTB_anc;
DerootTrees;
set root=outgroup outroot=monophyl;
RootTrees;
set opt=deltran;
ancstates MTB_anc = 0:all;
assume ancstates=MTB_anc;
log start file=output_paup.txt;
describetrees 1/plot=none chglist=yes;
```

### **Supplementary Note 1. Assumptions block for the PAUP analysis**
