# Supplementary material for: An evolutionary functional genomics approach identifies novel candidate regions involved in isoniazid resistance in Mycobacterium tuberculosis
Source: PubMed Central journal article supplement (PMC8613195; doi:10.1038/s42003-021-02846-z), 2021-11-24
Supplement: 42003_2021_2846_MOESM3_ESM.pdf [file 42003_2021_2846_MOESM3_ESM.pdf]

## Description of Additional Supplementary Files

**File name:** Supplementary Data 1

**Description:** Processed TnSeq data and resistance calls for each genomic region.

**File name:** Supplementary Data 2

**Description:** Functional and pathway analysis results.

**File name:** Supplementary Data 3

**Description:** Accession numbers for the large composite dataset.

**File name:** Supplementary Data 4

**Description:** Phylogenetic association data and results.

**File name:** Supplementary Data 5

**Description:** Diagnostic resistance mutation list.

**File name:** Supplementary Data 6

**Description:** Drug sensitivity of candidate genes insertion mutants.

**File name:** Supplementary Data 7

**Description:** Clinical resistance prediction results.

**File name:** Supplementary Data 8

**Description:** Accession numbers for the CRYPTIC subset.

**File name:** Supplementary Data 9

**Description:** Source data for the main figures.
